# Supplementary material for: Ferroelectric properties and Raman spectroscopy of the [(C4H9)4N]3Bi2Cl9 compound
Source: Royal Society of Chemistry journal article supplement (doi:10.1039/c9ra02577d), 2019-01-01
Supplement: c9ra02577d1.pdf [file c9ra02577d1.pdf]

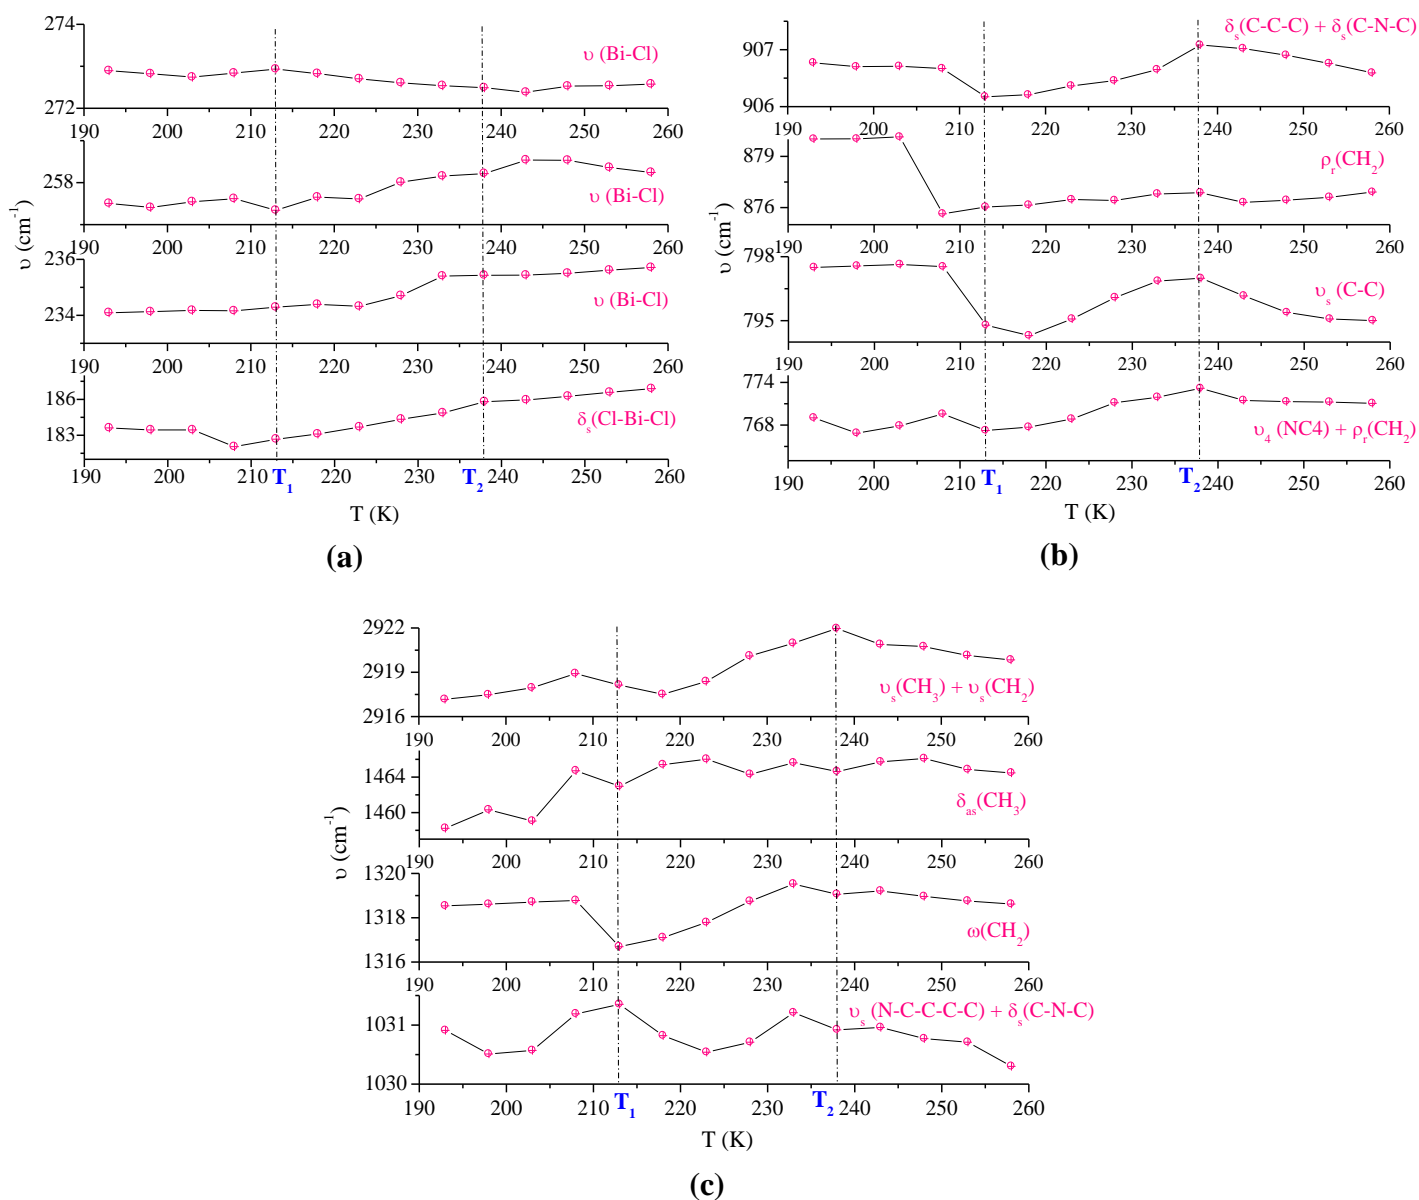

Fig. S1

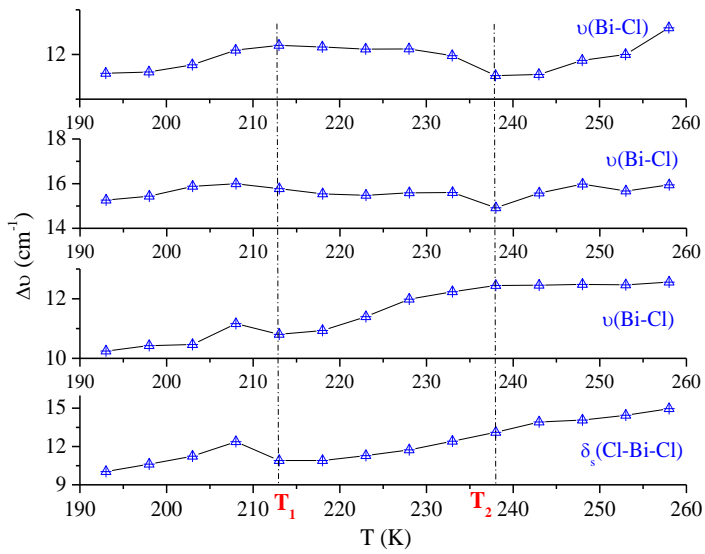

(a)

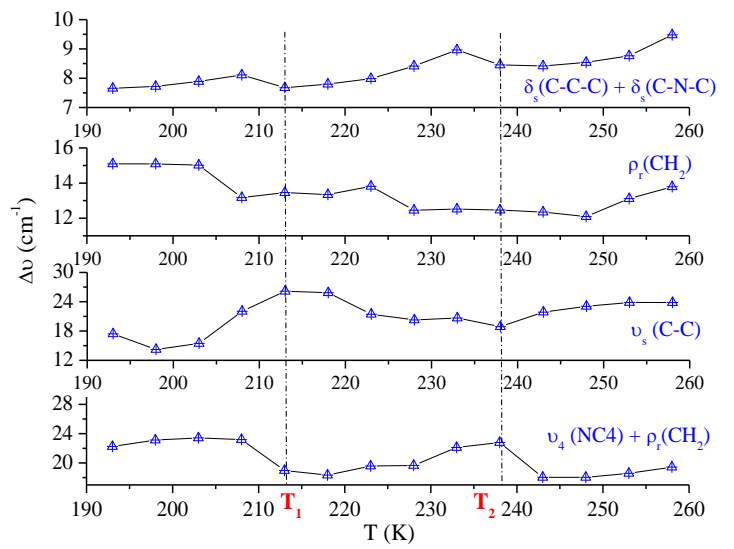

(b)

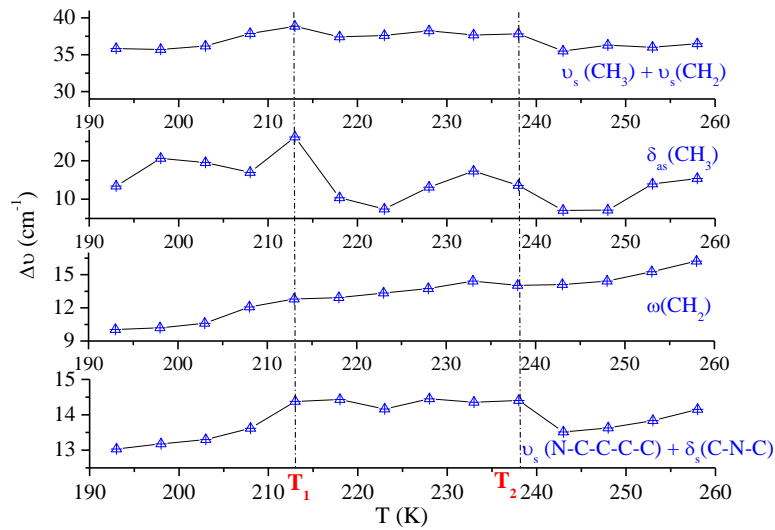

(c)

Fig. S2

**Table S**

| Raman shift (cm <sup>-1</sup> ) | Assignments                                                        |
|---------------------------------|--------------------------------------------------------------------|
| 170.1                           | $\nu_s(\text{Bi-Cl})$                                              |
| 184.4                           | $\delta_s(\text{Cl-Bi-Cl})$                                        |
| 193.1                           | $\nu_s(\text{Bi-Cl})$                                              |
| 229.2                           | $\nu_{as}(\text{Bi-Cl})$                                           |
| 239.3                           | $\nu_s(\text{Bi-Cl})$                                              |
| 270.5                           | $\nu_s(\text{Bi-Cl})$                                              |
| 769.8                           | $\nu_4(\text{NC}_4) + \rho_r(\text{CH}_2)$                         |
| 786.0                           | $\nu_3(\text{NC}_4)$                                               |
| 797.4                           | $\nu_s(\text{C-C-C-C})$                                            |
| 811.1                           |                                                                    |
| 849.3                           | $\nu_s(\text{N-C}) + \delta_s(\text{C-C-C}) + \nu_s(\text{C-N-C})$ |
| 866.5                           | $\rho_r(\text{CH}_2)$                                              |
| 875.1                           | $\delta_s(\text{C-C-C-}) + \delta_s(\text{C-N-C})$                 |
| 883.2                           |                                                                    |
| 906.9                           | $\delta_s(\text{C-C-C-}) + \delta_s(\text{C-N-C})$                 |
| 926.2                           | $\rho_r(\text{CH}_2)$                                              |
| 973.6                           | $\nu_1(\text{NC}_4)$                                               |
| 991.2                           | $\nu_s(\text{C-C})$                                                |
| 1008.1                          | $\nu_{as}(\text{C-C})$                                             |
| 1031.0                          | $\nu_s(\text{N-C-C}) + \delta_s(\text{C-N-C})$                     |
| 1054.4                          | $\delta_s(\text{C-C-C}) + \nu_s(\text{N-C})$                       |
| 1080.7                          |                                                                    |
| 1094.2                          | Bending vibration of the cation skeleton                           |
| 1108.1                          | $\delta_s(\text{C-C-C})$                                           |
| 1129.1                          | $\nu_s(\text{N-C-C})$                                              |
| 1151.4                          | $\tau(\text{CH}_2)$                                                |
| 1183.6                          |                                                                    |
| 1206.2                          |                                                                    |
| 1271.0                          | $\tau(\text{CH}_2)$                                                |
| 1284.3                          | $\rho_r(\text{CH}_3) + \nu_s(\text{N-C})$                          |
| 1319.8                          | $\omega(\text{CH}_2)$                                              |
| 1350.2                          | $\delta_s(\text{CH}_3)$                                            |
| 1385.9                          |                                                                    |
| 1402.1                          |                                                                    |
| 1424.3                          | $\delta_{as}(\text{CH}_3)$                                         |
| 1445.0                          |                                                                    |
| 1467.2                          | $\delta_s(\text{CH}_3)$                                            |
| 1502.3                          |                                                                    |
| 1510.1                          |                                                                    |
| 1519.5                          | $\delta_s(\text{CH}_2)$                                            |
| 2740.4                          |                                                                    |
| 2843.2                          |                                                                    |
| 2877.1                          | $\nu_s(\text{CH}_3) + \nu_s(\text{CH}_2)$                          |
| 2926.0                          | $\nu_s(\text{CH}_2)$                                               |
| 2936.3                          |                                                                    |
| 2963.6                          |                                                                    |
| 2984.1                          | $\nu_{as}(\text{CH}_3) + \nu_{as}(\text{CH}_2)$                    |

$\nu_s$ : Symmetric stretching;  $\nu_{as}$ : asymmetric stretching;  $\delta_s$ : symmetric bending;  $\delta_{as}$ : asymmetric bending;  
 $\omega$ : wagging;  $\tau$ : torsion;  $\rho_r$ : rocking.

### **Supplementary information captions**

**Fig. S1:** Temperature dependence of the wavenumbers of different modes of the  $[(C_4H_9)_4N]^+$  cation and the  $[Bi_2Cl_9]^{3-}$  anion.

**Fig. S2:** Temperature dependence of the half-widths of different modes of the  $[(C_4H_9)_4N]^+$  cation and the  $[Bi_2Cl_9]^{3-}$  anion.

**Table S:** Assignments of Raman shift of  $[(C_4H_9)_4N]_3Bi_2Cl_9$  compound.
